# Supplementary material for: Hybrid Nanoparticles Based on Cobalt Ferrite and Gold: Preparation and Characterization
Source: MDPI journal article supplement (doi:10.3390/met11050705), 2021-04-25
Supplement: s1 [file s1]

Archive with 1 entries (1 files):
- metals-1158028-supplementary.pdf
