# Supplementary material for: Hybrid Nanoparticles Based on Cobalt Ferrite and Gold: Preparation and Characterization
Source: MDPI journal article supplement (doi:10.3390/met11050705), 2021-04-25
Supplement: s1 [file s1 › metals-1158028-supplementary.pdf]

Thermal analysis was carried out under heating at 20 K/min in an air atmosphere (50 mL/min) on an SDT Q600 simultaneous thermal analyzer (TA Instrument, New Castle, DE, USA) interfaced with a Nicolet 380 FT-IR spectrometer (Thermo Electron Corporation, Waltham, MA, USA) via a TGA/FT-IR interface (a gas analyzer unit).

Figure 1 shows the thermal behavior of the CoFe<sub>2</sub>O<sub>4</sub>/Au sample. The mass loss is 2.5 wt. %. The exothermic effect with maximum at 227.27 °C corresponds to the oxidation of carbon and sulfur and release of CO<sub>2</sub> and SO<sub>2</sub>. An exothermic peak at 370.74 °C corresponds to the oxidation of NH<sub>2</sub>-groups and the release of N<sub>2</sub>O.

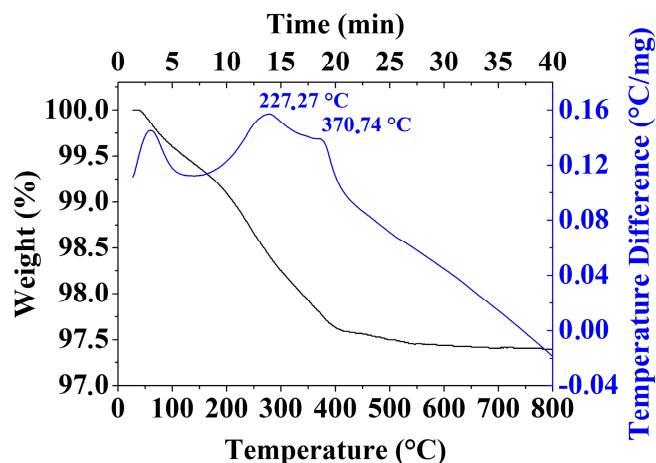

**Figure S1.** TGA curve (black) and DSC curve (blue) of CoFe<sub>2</sub>O<sub>4</sub>/Au NPs after 10 gold deposition cycles.

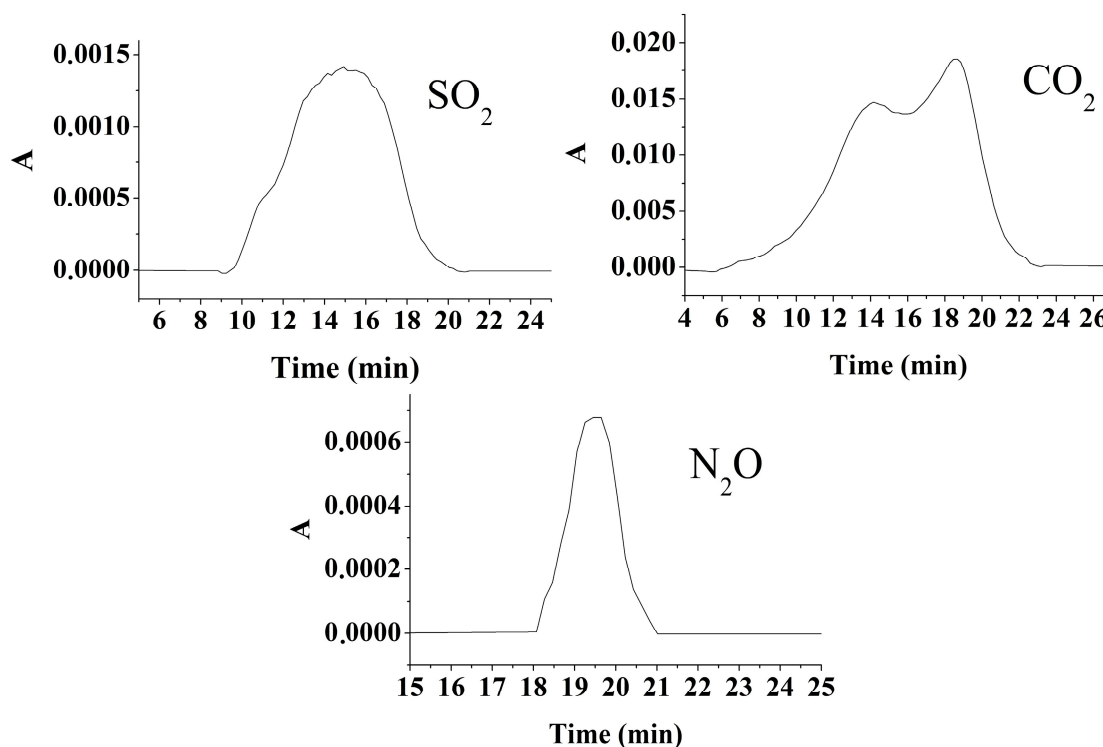

**Figure S2.** Optical absorption spectra of gases (H<sub>2</sub>O is not determined) evolved during TGA (thermal decomposition of organic part of CoFe<sub>2</sub>O<sub>4</sub>/Au NPs after 10 gold deposition cycles).
